# Supplementary material
Source: PubMed Central journal article supplement (PMC4797244)

Supplemental Figure 1. Semi-quantitative histological scoring of biological treatment of full thickness cartilage defects with hyaluronic acid (HA) hydrogels, microspheres containing TGF- $\beta$  (TGF), and mesenchymal stem cells (MSCs). (100=best, 0=worst, \* $p$ <0.05 vs. normal)

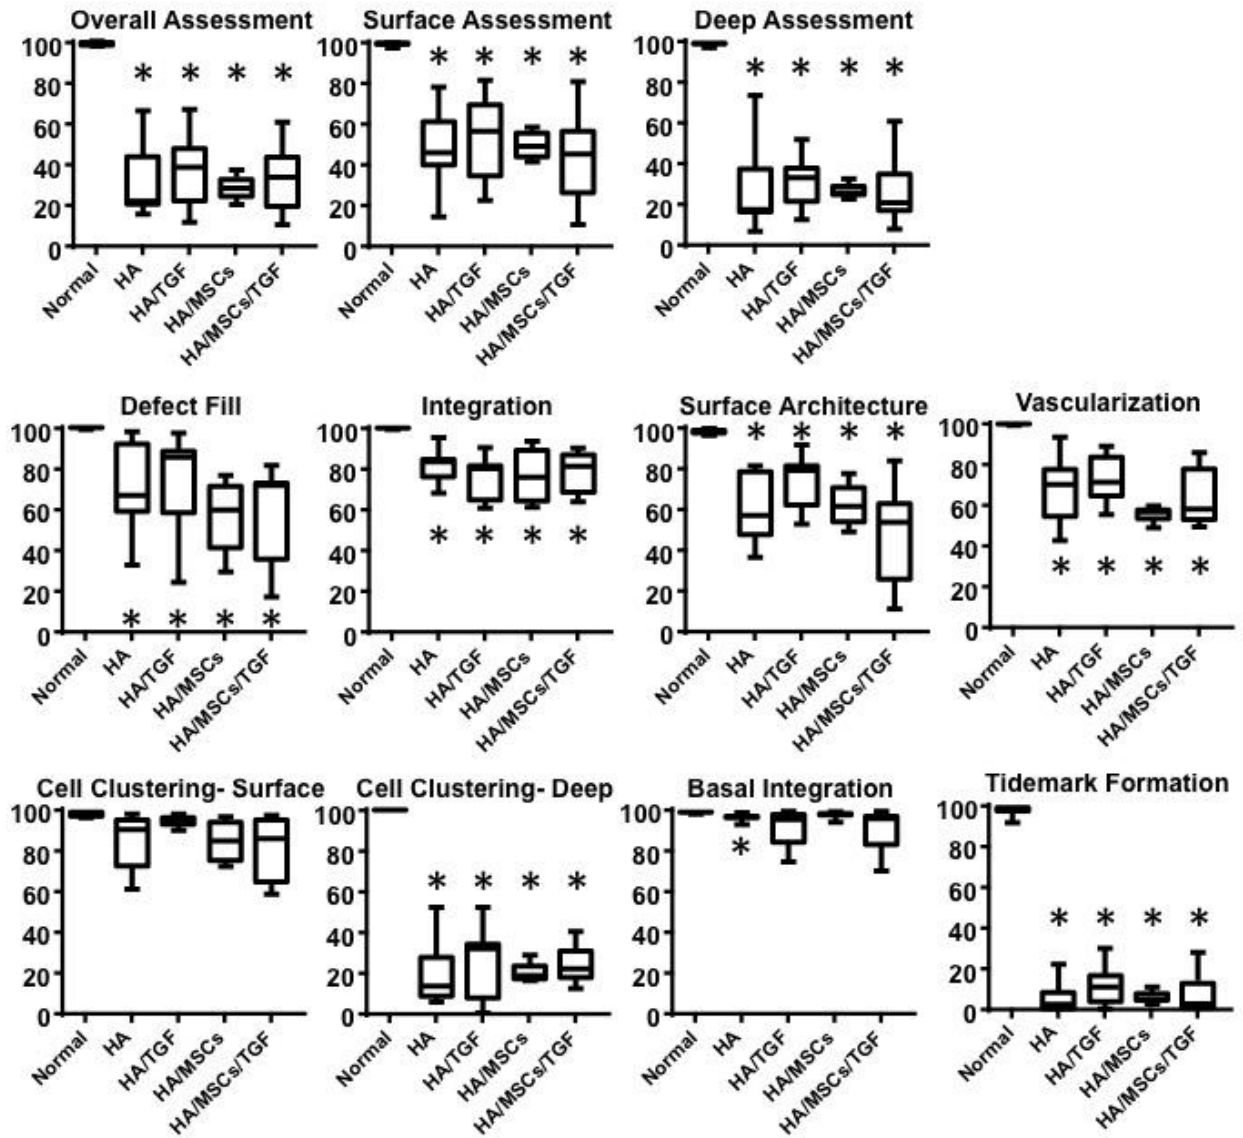

Supplement: Supplementary_Figure_030.pdf [file Supplementary_Figure_030.pdf]
